# Supplementary material
Source: publisher figshare collection journal article supplement (https://rs.figshare.com/ndownloader/files/13383551)
Supplement: Supplementary file 1 [file 13383551]

**TABLES**

**Table S1.** Details of the 42 studies selected after bibliographic search and screening, which constitute the ‘core papers set’ of this review.

|  | **Reference** | **Target saline species** | **Order** | **Family, development stage** | **Realised niche salinities** | **Experimental variable responses** | **Experimental salinities (g/l)*** | **Fundamental niche information** |
| --- | --- | --- | --- | --- | --- | --- | --- | --- |
| **1** | Alberts & Bradley 2011 Physiological and Biochemical Zoology | *Ochlerotatus cantator, Ochlerotatus melanimon, Ochlerotatus sollicitans, Ochlerotatus squamiger, Ochlerotatus taeniorhynchus* | Diptera | Culicidae larvae | hypo-meso | Survival/osmotic concentration hemolymph | 3.5-45.5 | Maximum survival in freshwater. Hyperregulation. No differences with freshwater species in freshwater. |
| **2** | Arribas et al. 2012 Journal of Biogeography | *Enochrus bicolor, Enochrus jesusarribasi* | Coleoptera | Hydrophilidae adults | meso-hyper | Thermal tolerance | 1-60 | No clear differences, only E. jesusarribasi UTL tend to be lower in freshwater. |
| **3** | Asakura 1978 Journal of Experimental Marine Biology and Ecology | *Aedes togoi* | Diptera | Culicidae larvae | hypo-meso | Posphatase activity | 0-35 | The alkaline phosphatase activity lower in freshwater. |
| **4** | Beadke et al. 1939 Journal of Experimental Biology | *Aedes detritus* | Diptera | Culicidae larvae | hypo-meso | Osmotic concentration hemolymph/ion retection | 0-30 | Hyperregulation but not as effectively as a freshwater species |
| **5** | Botella-Cruz et al. 2016 Limnetica | *Enochrus politus* | Coleoptera | Hydrophilidae adults | hypo-meso | Thermal tolerance | 1-60 | UTL higher in freshwater but LTL higher (lower tolerance) in freshwater |
| **6** | Bradley & Phillips 1977 Journal of Experimental Biology | *Ochlerotatus taeniorhynchus* | Diptera | Culicidae larvae | hypo-meso | Osmotic concentration hemolymph/ion concentration hemolymph/drinking rate | 3.5-70 | No dif in drinking rates. Hyperregulate. |
| **7** | Cannings 1981 Canadian Journal of Zoology | *Cenocorixa bifida* | Hemiptera | Corixidae adults | hypo-meso | Cuticle permeability | 0-15 | Permeability decrease at low and high salinities when ion reg problems arise |
| **8** | Carbonell et al. 2012 Freshwater Biology | *Sigara scripta, Sigara selecta* | Hemiptera | Corixidae adults, nymphs, eggs | hypo-meso | Survival time/hatching time | 0.43-72 | No differences in survival time in freshwater, only in the nymph of S. selecta higher survival time at 16. No diff in hatching time in freshwater and low sal, tend to increase with high sal. |
| **9** | Carbonell et al. 2016 Hydrobiologia | *Sigara scripta, Sigara selecta, Trichocorixa verticalis* | Hemiptera | Corixidae adults, nymphs, eggs | hypo-meso | Survival time/hatching success/hatching time/thermal tolerance/oviposition rate | 0.43-72 | Survival time of adults and nymphs in freshwater no dif with sal and even higher for one saline species than for the freshwater. Hatching success tend to be maximum in freshwater, but for S. selecta higher at 37. Hatching time no dif in freshwater and tend to increase at high sal. UTL tend to be higher in freshwater and LTL was lower (higher tolerance) in freshwater, but not clear diff. No dif in ovipositon rate. |
| **10** | Carbonell et al. 2017 Journal of Insect Physiology | *Sigara selecta* | Hemiptera | Corixidae adults | meso | Metabolic rate/reproductive rate | 10-35 | Lower metabolic cost at lower sal, oviposition rates with contrasted interactions with temperature or no diff with sal |
| **11** | Cartier et al. 2011 Journal of Experimental Marine Biology and Ecology journal | *Chironomus salinarius* | Diptera | Chironomidae larvae | brackish | Survival/time of development | 0-50 | Maximum survival at low and high salt due to alternation of physiological strategies. Minimum development time in freshwater and increase with sal. |
| **12** | Céspedes et al. 2013 Journal of Insect Physiology | *Ochthebius notabilis, Ochthebius glaber, Nebrioporus baeticus, Nebrioporus ceresyi* | Coleoptera | Hydraenidae, Dytiscidae adults | meso-hyper | Survival time | 0-173 | Maximum survival time in freshwater. Survival time start to decrease near maximum realised salinities. |
| **13** | Clark et al. 2004 Journal of Experimental Biology | *Ochlerotatus taeniorhynchus* | Diptera | Culicidae larvae | hypo-meso | Survival/larval stahe duration/growth rates/pupal mass | 0-35 | Survival is slightly higher at 7-14 than freshwater. Larval duration is minimum in freshwater and increasing with sal, growth rate is cte or increasing with salinity (so pupal mass is higher with salinity) |
| **14** | Clark et al. 2004 Journal of Experimental Biology | *Ochlerotatus taeniorhynchus* | Diptera | Culicidae larvae | hypo-meso | Survival/Hemolymph ph | 3.5 | No differences in ph tolerance compared with freshwater. Haemolymph ph is more stable than for the freshwater species |
| **15** | Coccia et al. 2013 Plos One | *Sigara lateralis, Trichocorixa verticalis* | Hemiptera | Corixidae adults | hypo-meso | Thermal tolerance | 0.72-13 | No clear effect in tolerances but UTL tends to be lower at low salinities. |
| **16** | Garrett & Bradley 1984 Journal of Experimental Biology | *Culiseta inornata* | Diptera | Culicidae larvae | brackish | Survival/growth rates/osmotic concentration hemolymph | 0-35 | Survival a low salinities. Growth rates maximum at low sal and decrease with sal. Hyperregulate. |
| **17** | Garrett & Bradley 1987 Journal of Experimental Biology | *Culex tarsalis* | Diptera | Culicidae larvae | brackish | Osmotic concentration hemolymph | 2.8-35 | Hyperegulate. |
| **18** | Herbst & Bradley 1988 Journal of Insect Physiology | *Hydrophorus plumbeus* | Diptera | Dolichopodidae larvae | meso-hyper | Survival/osmotic concentration hemolymph | 4.5-150 | Maximum survival at low sal. Hyperregulation. |
| **19** | Herbst et al. 1988 Journal of Insect Physiology | *Ephydra hians* | Diptera | Ephydridae larvae | meso-hyper | Survival/osmotic concentration hemolymph | 0-200 | Maximum survival at low sal. Hyperregulation. |
| **20** | Herbst et al. 1999 Great Basin Naturalist | *Ephydra hians, Ephydra gracilis* | Diptera | Ephydridae larvae | hypo-meso-hyper | Survival/Larval stage duration/osmotic concentration haemolymph | 0-200 | Maximum survival low sal. Hyperregulation. Larvae stage duration increase with high sal. |
| **21** | Herbst et al. 2013 Journal of Insect Conservation | *Cricotopus ornatus, Tanypus grodhausi, Enallagma clausum* | Odonata/Diptera | Chironomidae larvae, Coenagrionidae nymphs | hypo-meso | Survival/growth rates/feeding rates | 10-75 | Survival is maximum in lower sal. Growth rates and feeding rates are maximum for low sal. |
| **22** | Huang & Brattsten 2007 Entomological Society of America | *Ochlerotatus sollicitans* | Diptera | Culicidae larvae | brackish | Survival to temephos | 0-50 | Higher toxicity in freshwater than low sal (cross tolerance). |
| **23** | Kefford et al. 2006 Enviromental pollution | *Ischnura heterosticta* | Odonata | Coenagrionidae nymphs | hypo | Survival/heart activity /growth rates/development time/feeding rates | 0-25.2 | Maximum survival freshwater and high below 20 (>44 days), slower growth from 0.1-1. Heart beat, feeding similar across treatments |
| **24** | Kishi et al. 2009 European Journal of Entomology | *Aquarius paludum* | Hemiptera | Gerridae nymphs | brackish | Longevity/fecundity/flight | 0-45 | Quicker development, higher survival, higher longevity, more eggs, less long winged individuals in freshwater |
| **25** | Klishevich & Alley 1972 Entomological News | *Odontomyia communis* | Diptera | Stratiomidae larvae | meso-hyper | Survival across salinities | 0-120 | In distilled water mortality but not from 30 to 120. |
| **26** | Kokkin 1986 Australian Journal of Marine and Freshwater Resources | *Tanytarsus barbitarsis* | Diptera | Chironomidae larvae | meso-hyper | Survival/osmotic concentration hemolymph | 0-140 | Hyperregulate. Survival decrease with sal but only tested from 50. |
| **27** | Kölsch et al. 2010 Journal of Experimental Marine Biology and Ecology journal | *Macroplea mutica* | Coleoptera | Chrysomelidae adults | brackish | Behabiour | 0-10 | Both saline and freshwater prefer freshwater conditions |
| **28** | Mullenbach et al. 2004 Journal of vector ecology | *Ochlerotatus taeniorhynchus* | Diptera | Culicidae larvae | hypo-meso | Pupation | 0-40 | Maximum survival at 0 for all the species but acclimation in sal decrease survival in freshwater |
| **29** | Nemenz 1960 Journal of Insect Physiology | *Ephydra cinerea* | Diptera | Ephydridae larvae | meso-hyper | Osmotic concentration hemolymph | 0-320 | Hyperregulate. |
| **30** | Pallarés et al. 2012 Ecological Entomology | *Ochthebius notabilis, Ochthebius glaber, Nebrioporus baeticus, Nebrioporus ceresyi, Enochrus bicolor, Enochrus jesusarribasi* | Coleoptera | Hydrophilidae, Dytiscidae, Hydraenidae adults | meso-hyper | Survival/Emersion/Flight | 0-240 | Maximum survival and minimum escape in freshwater. |
| **31** | Pallarés et al. 2015 Plos One | *Enochrus bicolor, Enochrus jesusarribasi, Enochrus politus, Nebrioporus baeticus, Nebrioporus ceresyi, Nebrioporus clarki* | Coleoptera | Hydrophilidae, Dytiscidae adults | hypo-meso-hyper | Osmotic concentration hemolymph | 0.7-130 | Hyperregulation. |
| **32** | Pallarés et al. 2016 PeerJ | *Enochrus halophilus, Enochrus politus, Enochrus bicolor, Enochrus jesusarribasi* | Coleoptera | Hydrophilidae adults | hypo-meso-hyper | Desiccation tolerance | 0 | Survive aclimation 48h in low salinity. |
| **33** | Pallarés et al. 2017 Molecular Ecology | *Enochrus halophilus, Enochrus politus, Enochrus bicolor, Enochrus jesusarribasi, E. segmentinotatus* | Coleoptera | Hydrophilidae adults | hypo-meso-hyper | Osmotic concentration hemolymph | 0.7-130 | Hyperregulate in freshwater. |
| **34** | Patrick et al. 2001 The Journal of Experimental Biology | *Culex tarsalis* | Diptera | Culicidae larvae | hypo-meso | Osmotic concentration hemolymph/rates ion uptake | 0-17.5 | Hyperregulate but saline tolerant species faces less efficient ion uptake in freshwater. |
| **35** | Sánchez-Fernández et al. 2010 Physiological Entomology | *Nebrioporus baeticus, Nebrioporus ceresyi* | Coleoptera | Dytiscidae adults | meso-hyper | Thermal tolerance | 0-60 | Reduced upper and lower thermal tolerances at low salinities. |
| **36** | Scudder et al. 1971 Journal of Insect Physiology | *Cenocorixa bifida, Cenocorixa expleta* | Hemiptera | Corixidae adults | hypo | Osmotic concentration hemolymph/urine concentration/water content | 0-21.6 | Hyperregulation. |
| **37** | Tones & Hammer 1975 Canadian Journal of Zoology | *Trichocorixa verticalis* | Hemiptera | Corixidae adults | hypo-meso | Osmotic concentration hemolymph | 0-32.4 | Hyperregulation. |
| **38** | Tones 1977 Comp Biochemistry and Physiology | *Hygrotus salinarius* | Coleoptera | Dytiscidae larvae and adults | hypo-meso | Osmotic concentration hemolymph/urine | 0-48.2 | Hyperregulation. |
| **39** | Uyhelji et al. 2016 Molecular Ecology | *Anopheles merus* | Diptera | Culicidae larvae | hypo-meso | Gene expression | 0-17.5 | Minimum gene expression in freshwater and increase with salinity (cross talk inmuneresponse). |
| **40** | Van de Meutter et al. 2010 Hydrobiologia | *Trichocorixa verticalis, Sigara selecta, Sigara stricta* | Hemiptera | Corixidae adults, nymphs | hypo-meso | Survival | 0-52 | Maximum survival time at low sal for adults , for T. verticalis juveniles lower for 0 than for 4-36. |
| **41** | van Schie et al. 2009 Australian Journal of Entomology | *Aedes camptorhynchus* | Diptera | Culicidae larvae | brackist-hyper | Survival/number of adults | 3-89 | Some populations lower survival and number of eggs in low concentrations but eggs from saline waters. |
| **42** | White et al. 2010 The Journal of Experimental Biology | *Anopheles merus* | Diptera | Culicidae larvae | hypo-meso | Survival/lenght larvae stage | 0-35 | Maximum survival at low salinities in both chronic and acute expositions. Longer larvae stage with salinity. |

* Transformations to g/l were performed for comparative purposes using the following conversions: 1 g/l = 1 ppt = 0.72 mS/cm = 0.1 % salt weight = 720 umhos/cm. For the equivalence between hemolymph osmolalities and conductivities we followed the Table S1 from Pallarés et al. 2015.
